# Supplementary material for: Effectiveness of the Assessment of Burden of COPD (ABC) tool on health-related quality of life in patients with COPD: a cluster randomised controlled trial in primary and hospital care
Source: PubMed Central journal article supplement — BMJ Open. 2016 Jul 11;6(7):e011519. doi: 10.1136/bmjopen-2016-011519 (PMC4947734; doi:10.1136/bmjopen-2016-011519), 2016-07-11
Supplement: bmjopen-2016-011519supp.pdf [file bmjopen-2016-011519supp.pdf]

Supplementary file: Participating healthcare providers

| Primary care centres                  | Healthcare providers                |
|---------------------------------------|-------------------------------------|
| Huisartsenpraktijk Wedde              | J.D. Berg                           |
| Huisartsenpraktijk van Vliet          | V. van Vliet / N. Schumacher        |
| Huisartsenpraktijk Smink              | S. de Vries                         |
| Huisartsenpraktijk Rauws              | J. Rauws                            |
| Huisartsenpraktijk Zandweg-Oostwaard  | R. Wennekes                         |
| Huisartsenpraktijk Wijlre             | S. Koopmans / P. Schijns            |
| Huisartsenpraktijk Het Heelhuis       | R. van der Putten/ E. Zeegers       |
| Huisartsenpraktijk Renswoude          | J. Dirven / A. van Hamersveld       |
| Huisartsenpraktijk Gezondheidshuis    | F. Oldenhof                         |
| Groepspraktijk Huizen                 | N. IJkelstam                        |
| Gezondheidscentrum Samen beter        | G. van Roekel /R. Kockx             |
| Huisartsenpraktijk Noorderhaven       | W. de Vreeze / F.A. van Gemert      |
| Huisartsenpraktijk Appel en Hutter    | T. Lootsma                          |
| Huisartsenpraktijk Korvel             | P. Dingemans                        |
| Gezondheidscentrum de Haak            | A. Veldman                          |
| Huisartsen Stellendam                 | P. de Vries / I. Eigenraam          |
| Huisartsenpraktijk DOC werk           | F. Buys                             |
| Huisartsenpraktijk Oosting en Flenter | I. Steenkamp                        |
| Huisartsenpraktijk Mijnsheerenland    | K. Aulbers                          |
| Huisartsenpraktijk de Kade            | L. Kool                             |
| Huisartsen Hoge Hond                  | M. Vrolijk                          |
| Huisartsenpraktijk 't Hart            | L. Rorije                           |
| Huisartsenpraktijk Hoogh Teylingen    | M. de Winde                         |
| Huisartsenpraktijk Balkbrug           | B. Tigelaar                         |
| Huisartsenpraktijk Schuttevaer        | Z. Oostwoud                         |
| Huisartsenpraktijk de Latyrus         | J. Bakker                           |
| Huisartsenpraktijk Warnars            | M. Cousin                           |
| Gezondheidscentrum Hoensbroek         | R. Fornaro / A. Coenen              |
| Huisartsen Moolenburgh                | C. Moolenburgh                      |
| Huisartsenpraktijk Copenhaege         | Y. Holstein / M. Pruijt             |
| Huisartsenpraktijk Timmers            | J. Keijser                          |
| Huisartsenpraktijk Tweekelerveld      | B. Gierkink                         |
| Huisartsenpraktijk 't Rak             | M. van Gend                         |
| Van de Vijver & Fesevur huisartsen    | E. Moerman                          |
| Huisartsenpraktijk de Goudenregen hof | M. van der Zon                      |
| Huisartsenpraktijk Jan Hendrik        | N. Wiggers                          |
| Huisartsenpraktijk de Watertoren      | L. van Tiel                         |
| Huisartspraktijk Schravenhoff         | R. Schravenhoff                     |
| Zaaijer & Zaaijer Huisartsen          | G. Zaaijer                          |
| Hospitals                             | Healthcare providers                |
| Orbis MC                              | B. Maesen                           |
| Wilhelminaziekenhuis Assen            | S. de Hosson / T. Meints            |
| Diakonessenhuis                       | R. van Snippenburg                  |
| ZiekenhuisGroep Twente                | H. Timmer                           |
| Ziekenhuis Gelderse Vallei            | J. Verheul / M. van Nieuw-Amerongen |

|                                |                                          |
|--------------------------------|------------------------------------------|
| Rijnstate ziekenhuis           | F.J.J. Van den Elshout / A. van der Pouw |
| TweeSteden ziekenhuis          | J. Retera                                |
| Maasstadziekenhuis             | G. Verhoeven                             |
| Isala                          | Vd Berg / M. Joxhorst                    |
| Medisch Centrum Leeuwarden     | R. Koppers / A. Goosensen                |
| Catharina ziekenhuis Eindhoven | W. van Litsenburg                        |
| Deventer Ziekenhuis            | K. Groenewegen                           |
| Meander medisch centrum        | P. Dalinghaus / G. van Essen             |
| Ommelander Ziekenhuis Groep    | J.W. de Jong                             |
| MC Zuiderzee                   | N. Kinket                                |
| Ziekenhuis Bethesda            | R. van Heerde                            |
| Elkerliek                      | W. Pieters                               |

---
