# Supplementary material for: Effectiveness of the Assessment of Burden of COPD (ABC) tool on health-related quality of life in patients with COPD: a cluster randomised controlled trial in primary and hospital care
Source: PubMed Central journal article supplement — BMJ Open. 2016 Jul 11;6(7):e011519. doi: 10.1136/bmjopen-2016-011519 (PMC4947734; doi:10.1136/bmjopen-2016-011519), 2016-07-11
Supplement: bmjopen-2016-011519supp_appendixB.pdf [file bmjopen-2016-011519supp_appendixB.pdf]

## Appendix B Sample size calculation

The required sample size of 360 patients (180 patients per group) was based on the following assumptions:

- 1) A clinical response (a clinically relevant improvement of at least 4 points<sup>1</sup> of 50% in the intervention group versus 30% in the control group<sup>2,3</sup> (implying an effect size  $d = 0.42$  for the clinical response), and a power of 80% to detect a difference of the primary outcome between the intervention and control group with a two-tailed alpha of 5%. This assumption gave a sample size of 180 patients in total (90 patients per group), ignoring at first the design effect due to clustering of patients within physicians.
- 2) The number of participating GPs was about twice as large as the number of pulmonologists.
- 3) An estimated availability of 5 patients per GP and 8 patients per pulmonologist on average. This, together with assumptions 1 and 2, gave a total of 20 GPs and 10 pulmonologists. However, the following three steps (4-6) resulted in a sample size which was twice as large, that is 40 GPs and 20 pulmonologists.
- 4) An intraclass correlation coefficient (ICC) of 0.05, meaning that about 5% of the total outcome variation within each group is between GPs and between pulmonologists, instead of between patients of the same physician. Literature suggested that an ICC of 0.05 was a good default value for trials in primary care.<sup>4-6</sup> Combined with assumptions 2 and 3, and allowing for 10% more clusters (healthcare providers) to compensate the power loss due to variation in cluster size, that is, in number of patients included per healthcare provider, this ICC of 0.05 implied a design effect of 1.38.<sup>7</sup> The number of clusters was thus multiplied with 1.38.
- 5) A dropout rate of 25% of patients and/or clusters, was compensated by multiplying the number of clusters to be included by 1.33 (since 75% of 1.33 is 1). Dropouts were included into the analyses (intention to treat), but contributed less to the power due to missing data, hence the present correction.
- 6) Data analysis of the primary outcome with the recommended PQL2 (penalized quasi-likelihood) estimation method which required a further multiplication of the number of clusters with a factor of 1.10.<sup>8</sup>

Combining assumptions 4, 5 and 6 gave a multiplication factor of  $1.38 * 1.33 * 1.10 = 2$  for the number of GPs and pulmonologists as computed in steps 1 to 3, leading to the planned sample size of 40 GPs, 20 pulmonologists and 360 patients in total.

## References

1. Jones PW. St. George's Respiratory Questionnaire: MCID. *Copd* 2005; 2: 75-79.
2. Tashkin D, Kesten S. Long-term treatment benefits with tiotropium in COPD patients with and without short-term bronchodilator responses. *Chest* 2003; 123: 1441-1449.
3. Casaburi R, Mahler DA, Jones PW, *et al.* A long-term evaluation of once-daily inhaled tiotropium in chronic obstructive pulmonary disease. *Eur Respir J* 2002; 19: 217-224.
4. Adams G, Gulliford MC, Ukoumunne OC, *et al.* Patterns of intra-cluster correlation from primary care research to inform study design and analysis. *J Clin Epidemiol* 2004; 57: 785-794.
5. Eldridge SM, Ashby D, Feder GS, *et al.* Lessons for cluster randomized trials in the twenty-first century: a systematic review of trials in primary care. *Clin Trials* 2004; 1: 80-90.

6. van Breukelen GJ, Candel MJ. Efficient design of cluster randomized and multicentre trials with unknown intraclass correlation. *Stat Methods Med Res* 2011;Epub ahead of print.
7. van Breukelen GJ, Candel MJ. Calculating sample sizes for cluster randomized trials: we can keep it simple and efficient! *J Clin Epidemiol* 2012; 65: 1212-1218.
8. Candel MJ, Van Breukelen GJ. Sample size adjustments for varying cluster sizes in cluster randomized trials with binary outcomes analyzed with second-order PQL mixed logistic regression. *Stat Med* 2010; 29: 1488-1501.
